# Supplementary material for: Near-infrared (NIR) luminescent metallopolymers based on Ln4(Salen)4 nanoclusters (Ln = Nd or Yb)
Source: Royal Society of Chemistry journal article supplement (doi:10.1039/c3tc31814a), 2013-11-07

Supporting information For *J. Mater. Chem. C*

**Near-infrared (NIR) luminescent metallopolymers  
based on Ln<sub>4</sub>(Salen)<sub>4</sub> nanoclusters (Ln = Nd or Yb)**

**Weixu Feng, Yao Zhang, Zhao Zhang, Peiyang Su, Xingqiang Lü, Jirong Song,  
Daidi Fan, Wai-Kwok Wong, Richard A. Jones, Chengyong Su**

<sup>a</sup>Shaanxi Key Laboratory of Degradable Medical Material, Shaanxi Key Laboratory of  
Physico-inorganic Chemistry, Northwest University, Xi'an 710069, Shaanxi, China

<sup>b</sup>Department of Chemistry, Hong Kong Baptist University, Waterloo Road, Kowloon Tong,  
Hong Kong, China

<sup>c</sup>Department of Chemistry and Biochemistry, The University of Texas at Austin, 1 University  
Station A5300, Austin, TX 78712-0165, United States

<sup>d</sup>MOE Laboratory of Bioinorganic and Synthetic Chemistry/KLGH EI of Environment and  
Energy Chemistry, School of Chemistry and Chemical Engineering, Sun Yat-Sen University,  
Guangzhou 510275, Guangdong, China

To whom correspondence should be addressed.

\*Xingqiang Lü: 86-29-88302312(o); E-mail: [lvxq@nwu.edu.cn](mailto:lvxq@nwu.edu.cn)

## Supporting information

**Table 1S** Selected bond lengths (Å) and angles (°) for complex **3**·4EtOH·6H<sub>2</sub>O

| <b>3</b> ·4EtOH·6H <sub>2</sub> O |           |                            |           |
|-----------------------------------|-----------|----------------------------|-----------|
| Yb(1)-N(1)                        | 2.435(5)  | Yb(2)-O(1)                 | 2.695(4)  |
| Yb(1)-N(2)                        | 2.380(5)  | Yb(2)-O(2)                 | 2.330(4)  |
| Yb(1)-O(2)                        | 2.259(4)  | Yb(2)-O(3)                 | 2.282(4)  |
| Yb(1)-O(3)                        | 2.294(4)  | Yb(2)-O(4)                 | 2.649(4)  |
| Yb(1)-O(5) <sup>a</sup>           | 2.449(4)  | Yb(2)-O(6)                 | 2.387(4)  |
| Yb(1)-O(b) <sup>a</sup>           | 2.306(4)  | Yb(2)-O(7)                 | 2.210(4)  |
| Yb(1)-O(9)                        | 2.285(4)  | Yb(2)-O(8)                 | 2.556(4)  |
| Yb(1)-O(9) <sup>a</sup>           | 2.274(4)  | Yb(2)-O(9)                 | 2.336(4)  |
|                                   |           | Yb(2)-Cl(1)                | 2.706(2)  |
| C(6)-C(7)                         | 1.283(2)  | C(25)-C(26)                | 1.255(3)  |
| C(34)-C(35)                       | 1.231(2)  | C(51)-C(52)                | 1.261(2)  |
| Yb(1)···Yb(2)                     | 3.4375(5) | Yb(1)···Yb(1) <sup>a</sup> | 3.6879(4) |
| Yb(1)···Yb(2) <sup>a</sup>        | 3.7947(4) | N(3)-H(3)···O(6)           | 2.615(8)  |
|                                   |           |                            | 135.6(4)  |

Symmetrical transformations used to generate equivalent atoms: a:  $-x+1, -y+2, -z+1$  for

**3**·4EtOH·6H<sub>2</sub>O

**Figure 1S** Perspective drawing of the cationic part in complex  $3 \cdot 4\text{EtOH} \cdot 6\text{H}_2\text{O}$  with the strong intramolecular  $\text{N4-H4} \cdots \text{O7}$  H-bond interactions ( $2.615(8)$  Å and  $135.6(4)^\circ$ )

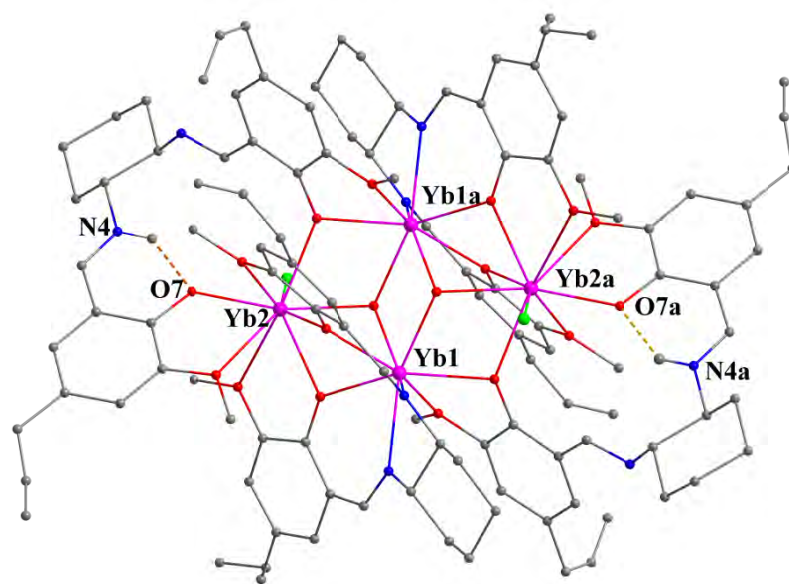

**Figure 2S** Visible emission and excitation spectra of the ligand  $\text{H}_2\text{L}$  and complex **5** in MeCN solution at  $1 \times 10^{-5}$  M at room temperature

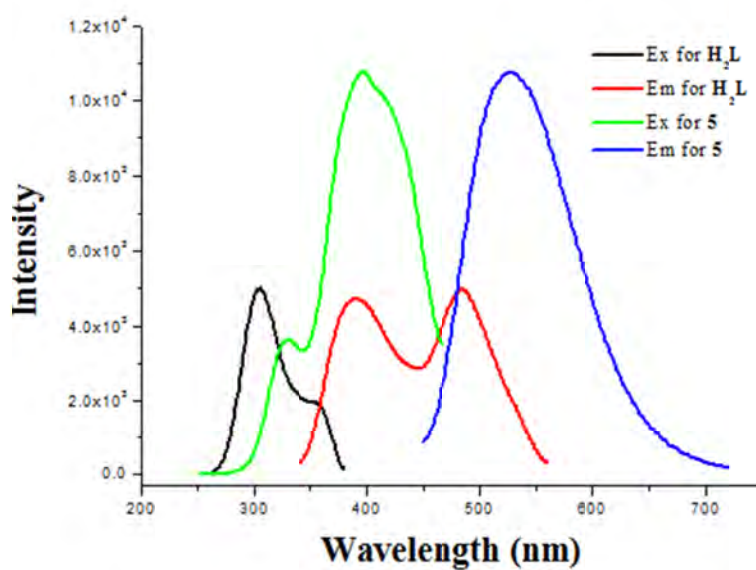

**Figure 3S** Visible emission and excitation spectra of the metallopolymer **PNBE-Co-5** in  $\text{CHCl}_3$  solution at 0.3 g/L at room temperature

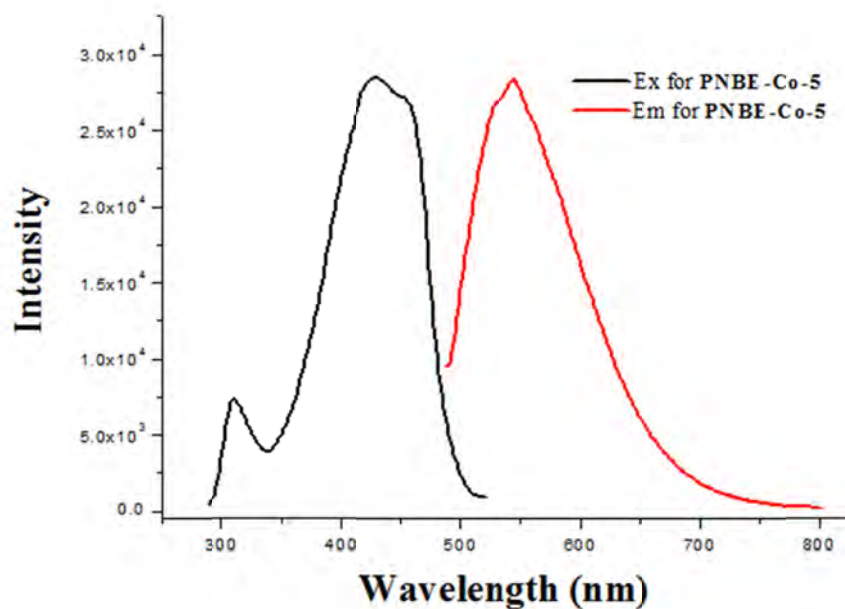

**Figure 4S** DR spectra of  $\text{Ln}_4(\text{Salen})_4$  monomers (Ln = Nd, **2**; Yb, **3**; Er, **4** or Gd, **5**) at room temperature

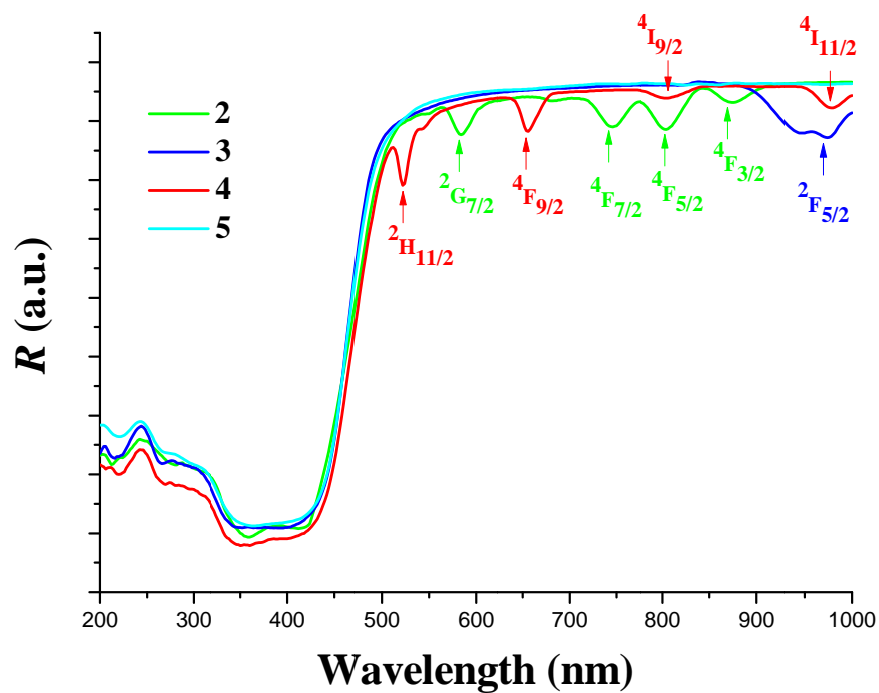

**Figure 5S** Visible emission and excitation spectra of metallopolymer **PNBE-Co-5** and complex **5** in solid state at room temperature

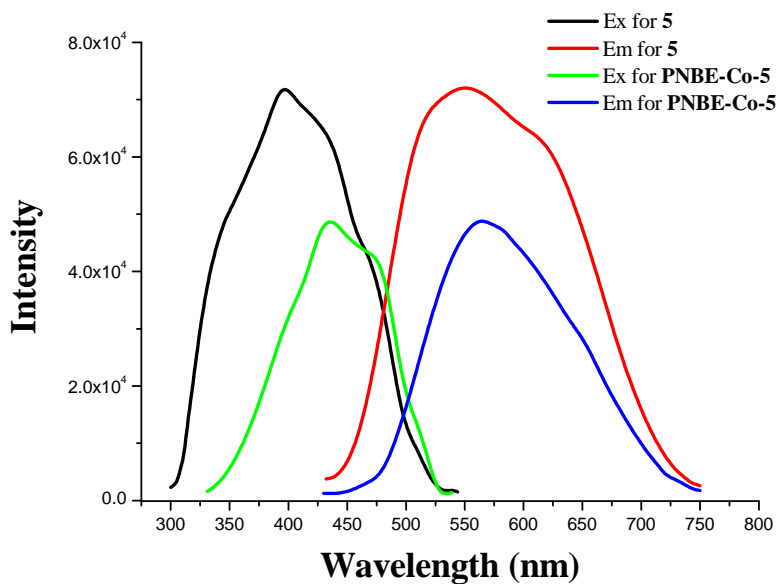

**Figure 6S** NIR emission and excitation spectra of metallopolymer **PNBE-Co-3** from different monomer ratios (30:1, 50:1 and 100:1) of NBE to **3** in solid state at room temperature

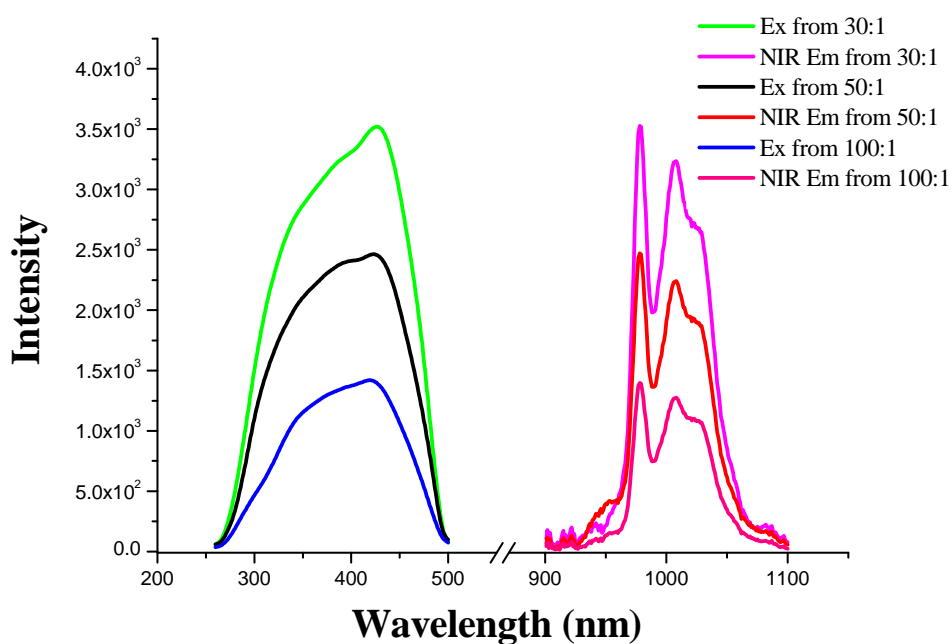

Supplement: c3tc31814a.pdf [file c3tc31814a.pdf]
